# Supplementary material
Source: PubMed Central journal article supplement (PMC4637241)
Supplement: NIHMS722924-supplement-2.pdf [file NIHMS722924-supplement-2.pdf]

## SUPPLEMENTAL MOVIE LEGENDS

**MOVIE S1. CRC networks in intact MLN GC.** TPLSM of MLN from *Cxcl12*-GFP mice 1 day after transfer with CFP<sup>+</sup> naïve B cells (FOB) to mark the GC edge (white, dotted line) and treatment with PE-IC to label FDCs and TBMs. Entire GC shown as 193µm Z-stack, then as 30µm maximum intensity Z-projections that move through the Z-plane starting from capsule-proximal edge of the GC and then as 30µm maximum intensity Y-projections that move through the Y-plane. CRCs, FDCs and TBMs are labeled and areas of undetectable DZ stroma indicated (arrowhead). Data correspond to Fig. 1E and were taken at 0.55µm/pixel. Scale bar is 50µm.

**MOVIE S2. CRC networks in intact pLN GC and primary follicle.** TPLSM of pLNs from *Cxcl12*-GFP mice 1 day after transfer with CFP<sup>+</sup> naïve B cells (FOB) to mark the GC edge or follicle edge (white, dotted line) and treatment with PE-IC to label FDCs. Intact pLN GC shown as 203µm Z-stack and then as 30µm maximum intensity Z-projections that move through the Z-plane starting from capsule-proximal edge of the GC. Entire pLN primary follicle shown as 256µm Z-stack and then visualized in the same way. CRCs and FDCs are labeled and areas of undetectable DZ stroma indicated (arrowhead). GC data correspond to Fig. S1A and were taken at 0.64µm/pixel and primary follicle data correspond to Fig. S1D and were taken at 0.55µm/pixel. Scale bar is 50µm.

**MOVIE S3. GC B cells in CRC networks in *Cxcl12*-GFP PP GC DZs.** TPLSM of *Cxcl12*-GFP MD4 PPs 2 weeks after transfer of WT and CFP<sup>+</sup> B cells and 1 day after transfer of CMTMR-labeled WT B cells to label a portion of the FOB cells and outline the GC (white, dotted line). Collagen marks the serosal edge of the PP. Data are shown as 3D rotations on the X-

and Y-axis, and correspond to Fig. 2A-C. Example 1 (60 $\mu$ m z-stack) was taken at 0.83 $\mu$ m/pixel and scale bar is 50 $\mu$ m. Example 2 (69 $\mu$ m z-stack) was taken at 0.42 $\mu$ m/pixel and scale bar is 15 $\mu$ m.

**MOVIE S4. Time-lapse sequence of a 60 $\mu$ m Z-stack image showing the dynamics of GC B cells in a *Cxcl12*-GFP PP DZ CRC network.** TPLSM of *Cxcl12*-GFP MD4 PPs 2 weeks after transfer of WT and CFP<sup>+</sup> B cells. Tracks of GC B cells indicated in white. Data correspond to Fig. 2B. Scale bar is 30 $\mu$ m and resolution is 0.83 $\mu$ m/pixel. Elapsed time is shown as hh:mm:ss.

**MOVIE S5. Time-lapse sequence of a 69 $\mu$ m Z-stack image showing GC B cells crawling on CRC processes in a *Cxcl12*-GFP PP DZ.** TPLSM of *Cxcl12*-GFP MD4 PPs 2 weeks after transfer of WT and CFP<sup>+</sup> B cells. Tracks of GC B cells indicated in white. Data correspond to Fig. 2C. Scale bar is 15 $\mu$ m and resolution is 0.42 $\mu$ m/pixel. Elapsed time is shown as hh:mm:ss.
